# Supplementary material for: New Catalytic Method for the Synthesis of 2,7-Dicycloalkyl-hexaazaperhydropyrenes
Source: Hindawi journal article supplement (doi:10.1155/2016/8406172), 2016-01-01
Supplement: f1 [file 8406172.f1.pdf]

## Supporting Information

### **New Catalytic Method for the Synthesis of 2,7-Dicycloalkyl-hexaazaperhydropyrenes**

Elena Rakhimova, Victor Kirsanov, Radik Zainullin, Askhat Ibragimov, and Usein Dzhemilev

Figure 3:  $^1\text{H}$  NMR spectra of compound **2**.

Figure 4:  $^{13}\text{C}$  NMR spectra of compound **2**.

Figure 5:  $^1\text{H}$  NMR spectra of compound **3**.

Figure 6:  $^{13}\text{C}$  NMR spectra of compound **3**.

Figure 7:  $^1\text{H}$  NMR spectra of compound **5**.

Figure 8:  $^{13}\text{C}$  NMR spectra of compound **5**.

Figure 9:  $^1\text{H}$  NMR spectra of compound **6**.

Figure 10:  $^{13}\text{C}$  NMR spectra of compound **6**.

Figure 11:  $^1\text{H}$  NMR spectra of compound **7**.

Figure 12:  $^{13}\text{C}$  NMR spectra of compound **7**.

Figure 13:  $^1\text{H}$  NMR spectra of compound **8**.

Figure 14:  $^{13}\text{C}$  NMR spectra of compound **8**.

## 2,7-Dicyclopropyl-2,3a,5a,7,8a,10a-hexaazaperhydropyrene (2)

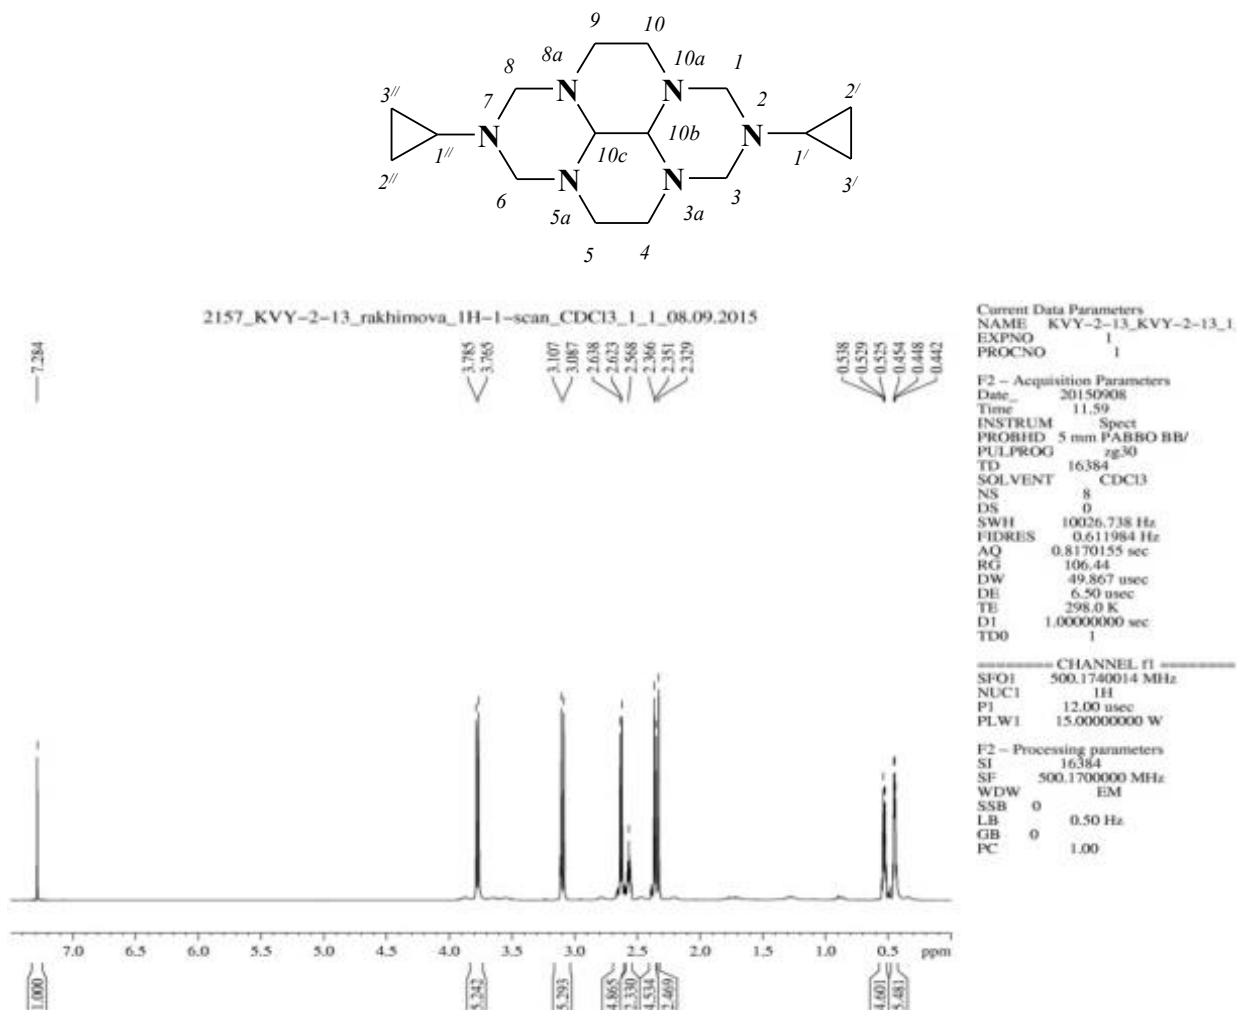

Figure 3: <sup>1</sup>H NMR spectra of compound 2.

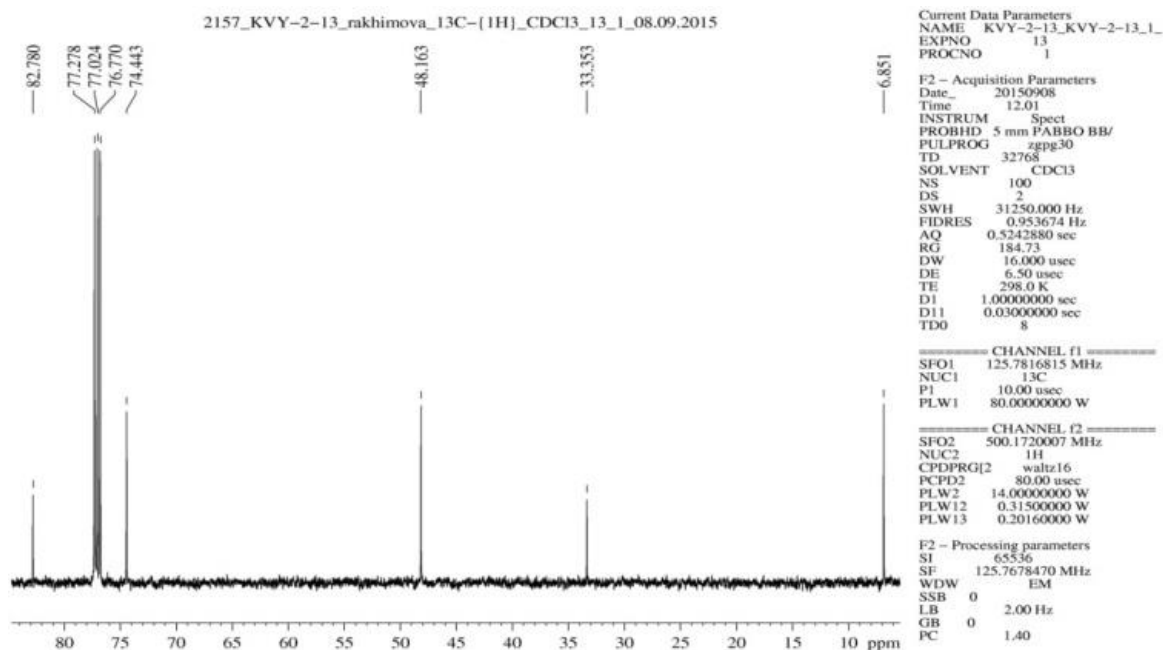

Figure 4: <sup>13</sup>C NMR spectra of compound 2.

## 2,7-Dicyclopentyl-2,3a,5a,7,8a,10a-hexaazaperhydropyrene (3)

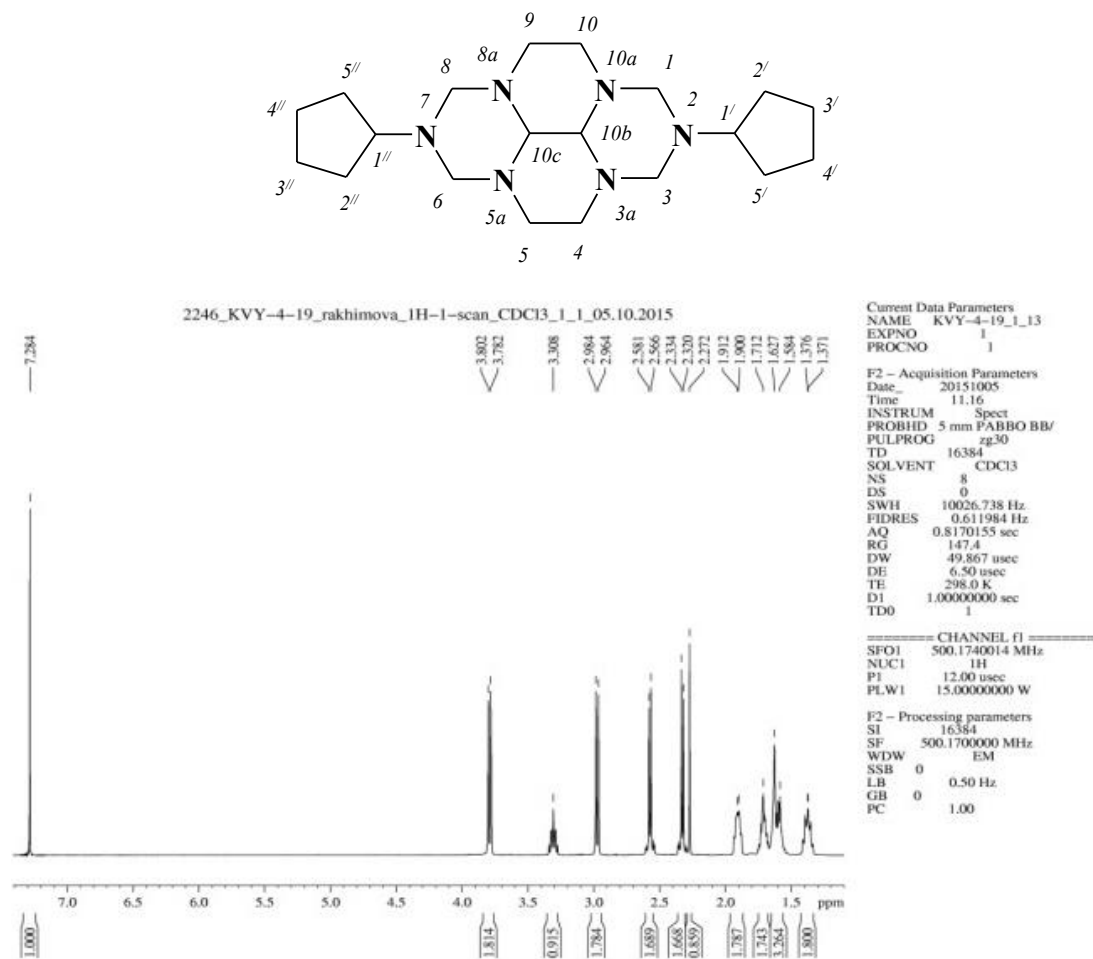

Figure 5:  $^1\text{H}$  NMR spectra of compound **3**.

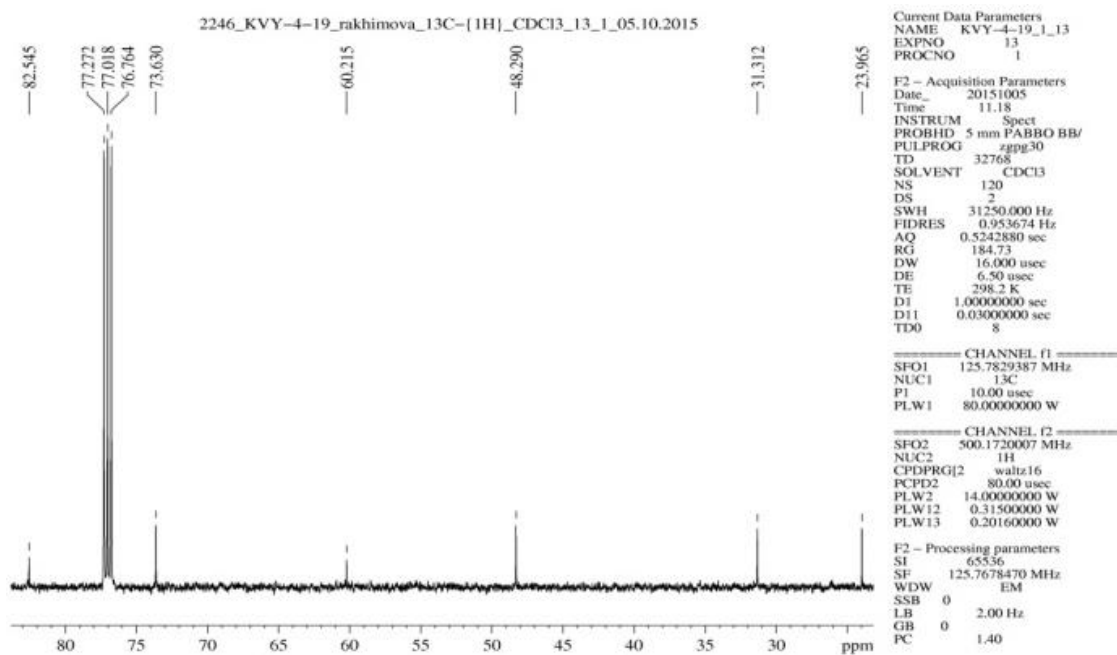

Figure 6:  $^{13}\text{C}$  NMR spectra of compound **3**.

## 2,7-Ditetrahydropyran-4-yl-2,3a,5a,7,8a,10a-hexaazaperhydropyrene (5)

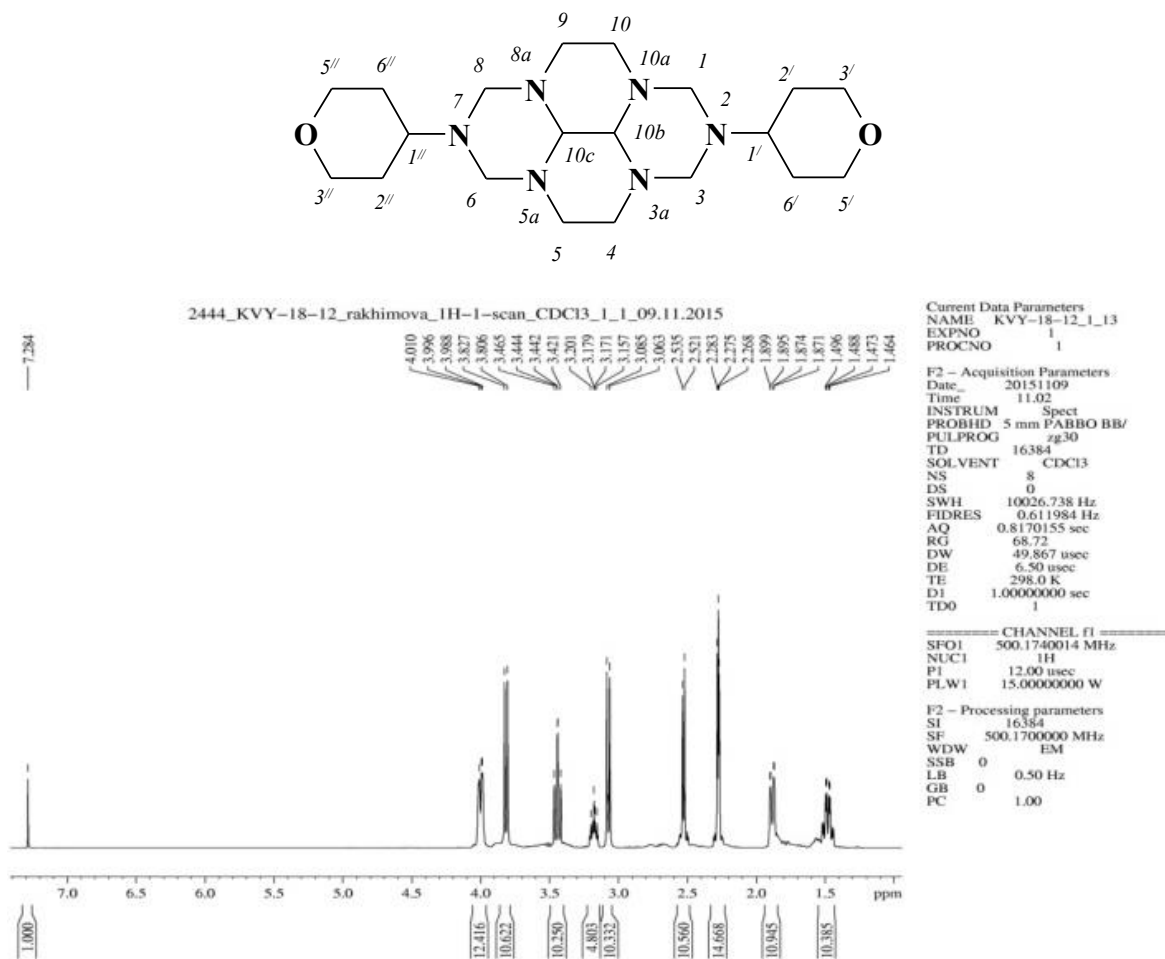

Figure 7: <sup>1</sup>H NMR spectra of compound 5.

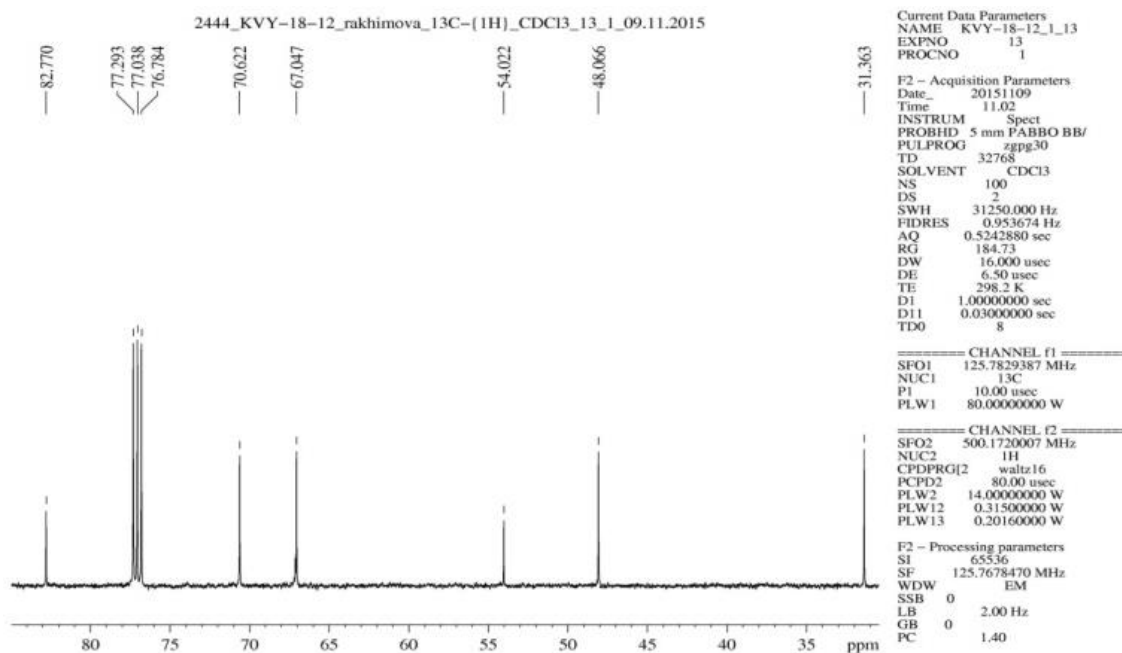

Figure 8: <sup>13</sup>C NMR spectra of compound 5.

## 2,7-Dicycloheptyl-2,3a,5a,7,8a,10a-hexaazaperhydropyrene (6)

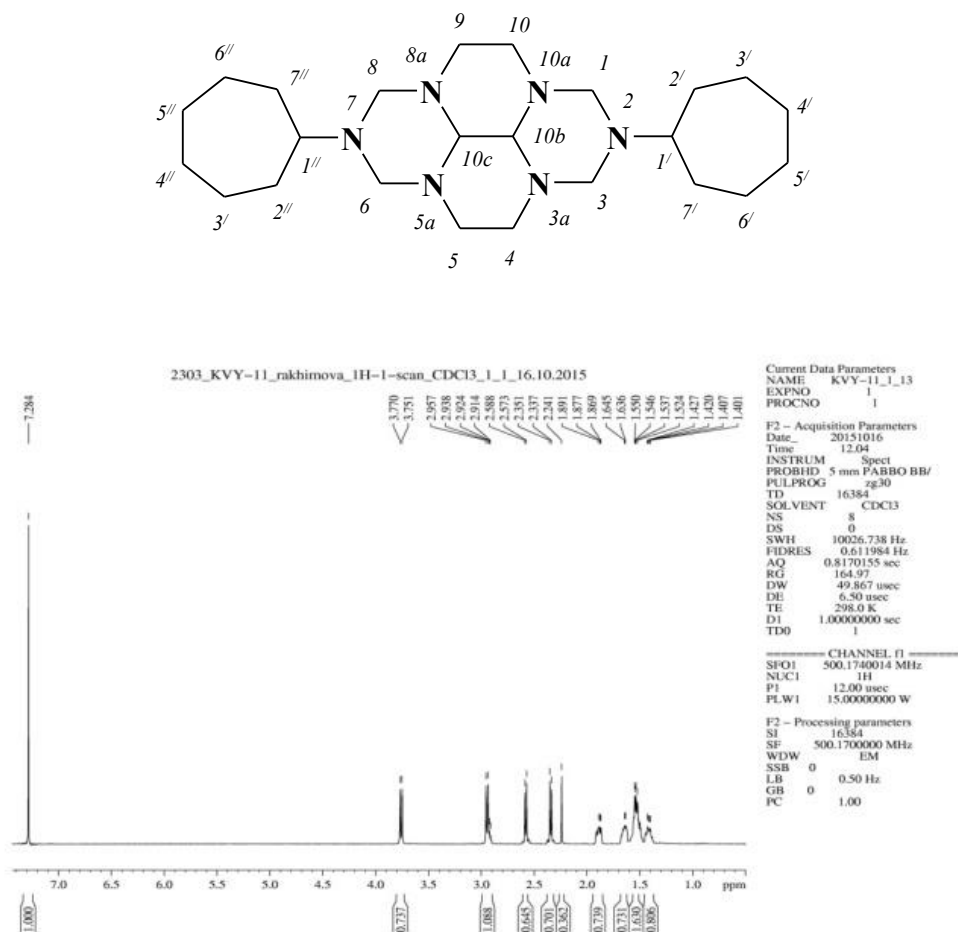

Figure 9: <sup>1</sup>H NMR spectra of compound 6.

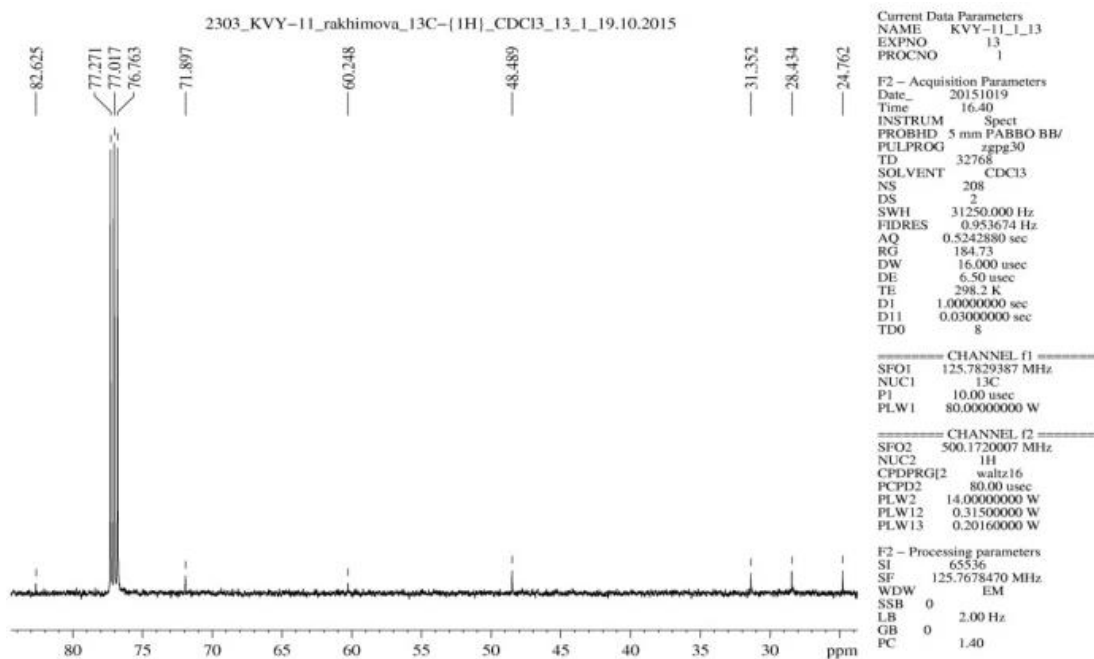

Figure 10: <sup>13</sup>C NMR spectra of compound 6.

## 2,7-Dicyclooctyl-2,3a,5a,7,8a,10a-hexaazaperhydropyrene (7)

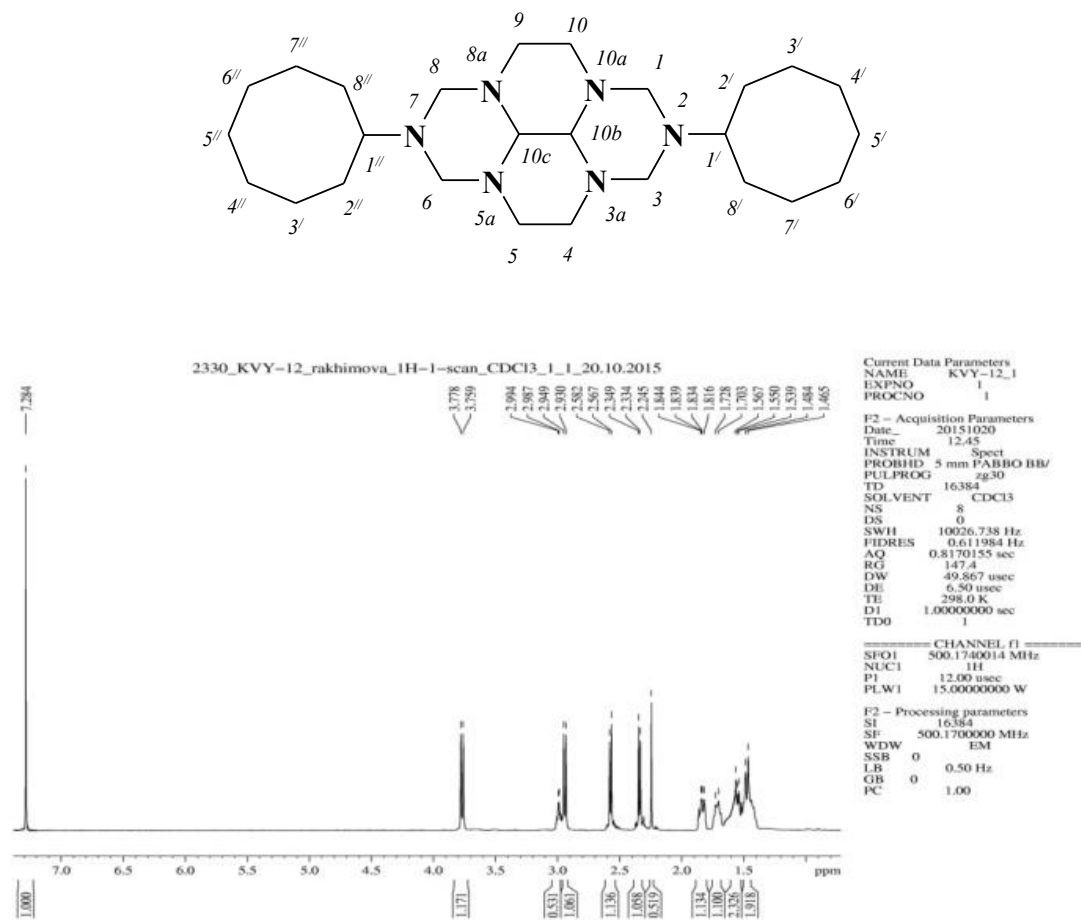

Figure 11:  $^1\text{H}$  NMR spectra of compound 7.

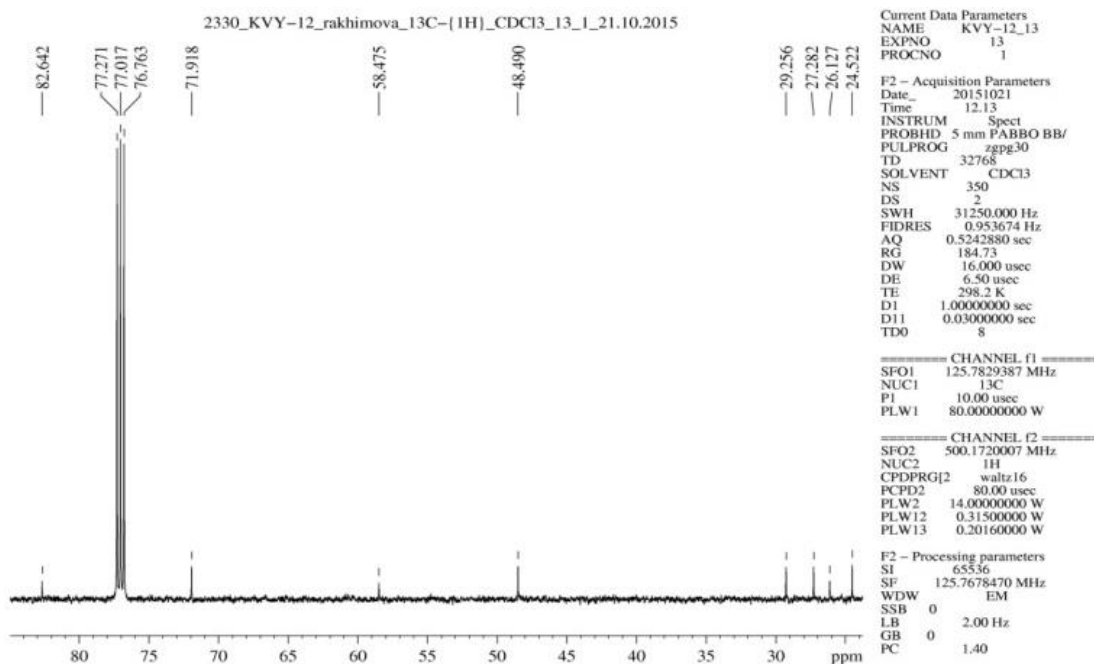

Figure 12:  $^{13}\text{C}$  NMR spectra of compound 7.

## 2,7-Dibi[2.2.1]hept-2-yl-2,3a,5a,7,8a,10a-hexaazaperhydropyrene (8)

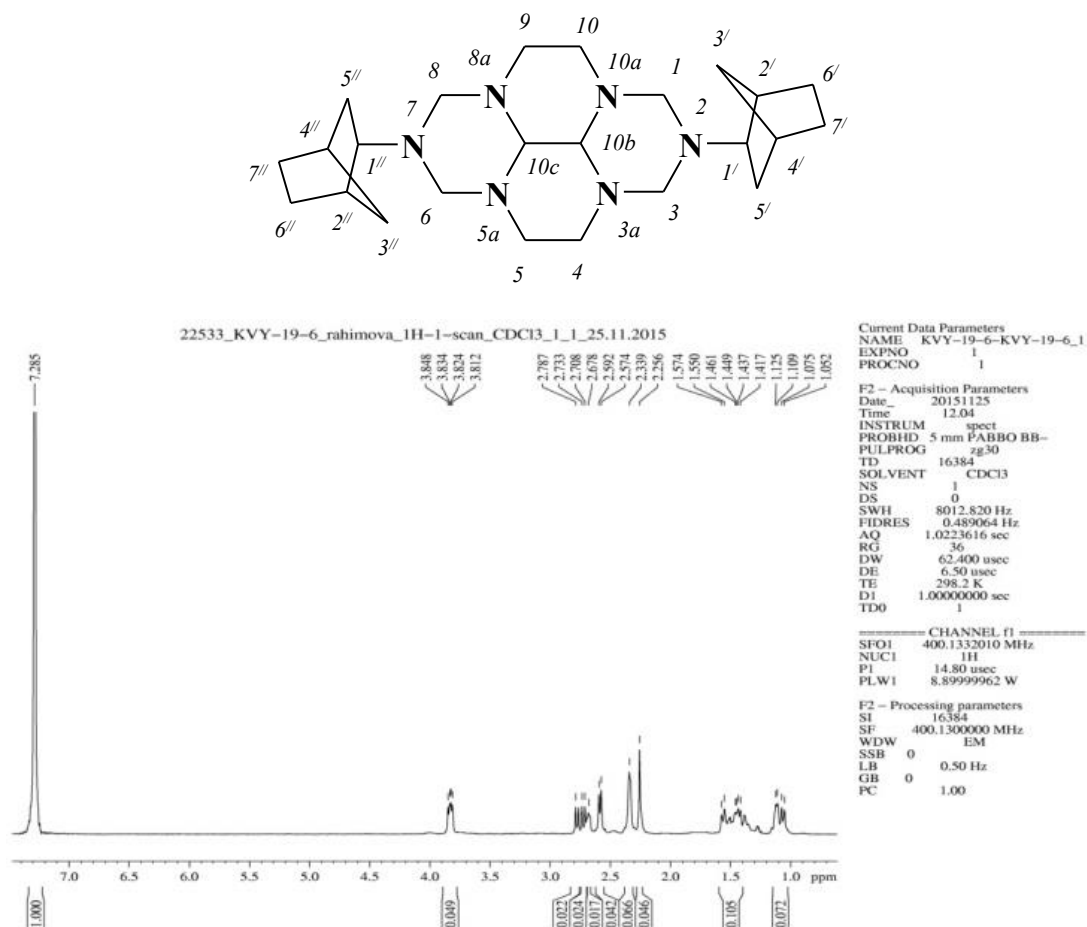

Figure 13:  $^1\text{H}$  NMR spectra of compound 8.

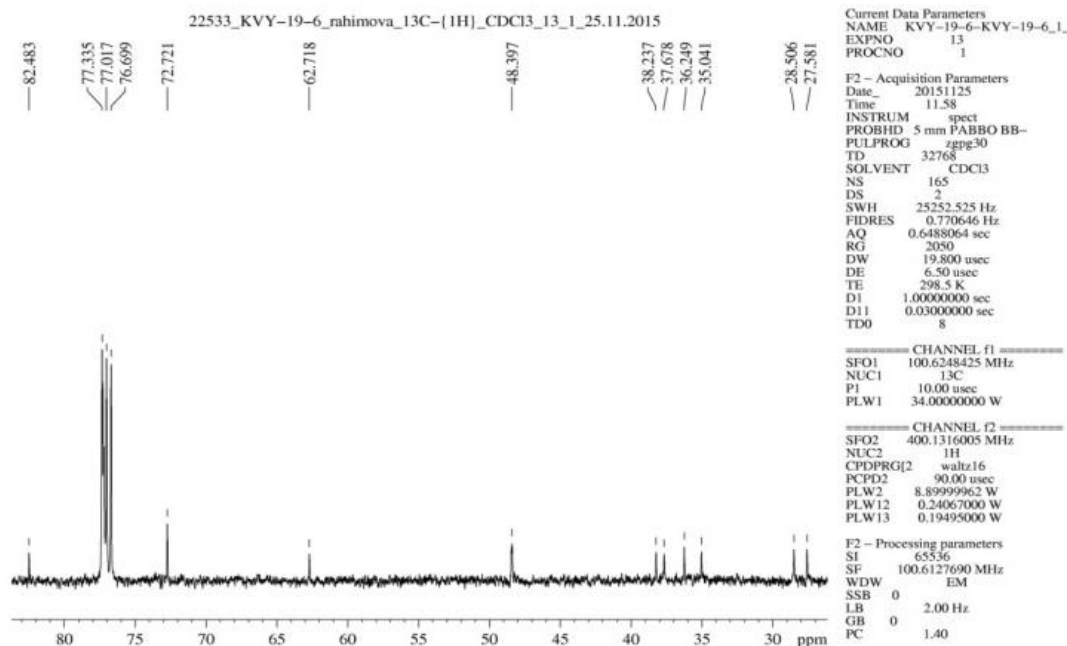

Figure 14:  $^{13}\text{C}$  NMR spectra of compound 8.
